# Supplementary material
Source: publisher figshare collection journal article supplement (https://future-science-group.figshare.com/ndownloader/files/23817944)
Supplement: Supplementary file 1 [file 23817944]

**Oligonucleotide blockers used in hybridization capture**

Thruplex p5-UMI-11nt ext

AATGATACGGCGACCACCGAGATCTACACAGGCGAAGACACTCTTTCCCTACACGACGCTCTTC

CGATCTXXXXXXTCAGTAGCTCA/3block/

Thruplex p5-UMI-8nt ext

AATGATACGGCGACCACCGAGATCTACACAGGCGAAGACACTCTTTCCCTACACGACGCTCTTC

CGATCTXXXXXXGTAGCTCA/3block/

Thruplex p7-UMI-11nt ext

CAAGCAGAAGACGGCATACGAGATXXXXXXXXGTGACTGGAGTTCAGACGTGTGCTCTTCCGAT

CTXXXXXXTCAGTAGCTCA/3block/

Thruplex p7-UMI-8nt ext

CAAGCAGAAGACGGCATACGAGATXXXXXXXXGTGACTGGAGTTCAGACGTGTGCTCTTCCGAT

CTXXXXXXGTAGCTCA/3block/

Note: ‘X’ represents either sample-unique barcode or unique molecular identifier (UMI) sequence regions.

**P5 Primer for post-capture enrichment**

AATGATACGGCGACCACCGA

**P7 Primer for post-capture enrichment**

CAAGCAGAAGACGGCATACGA
